# Supplementary material for: The impact of vibrational Raman scattering of air on DOAS measurements of atmospheric trace gases
Source: Copernicus journal article supplement (doi:10.5194/amt-8-3767-2015), 2015-09-17
Supplement: Supplementary file 1 [file amt-8-3767-2015-supplement.zip]

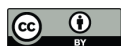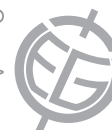

## *Supplement of*

# **The impact of vibrational Raman scattering of air on DOAS measurements of atmospheric trace gases**

**J. Lampel et al.**

*Correspondence to:* J. Lampel ([johannes.lampel@iup.uni-heidelberg.de](mailto:johannes.lampel@iup.uni-heidelberg.de))

- [amt-8-3767-2015-supplement-title-page.pdf](#)
- [VRS\\_N2\\_O2\\_based\\_on\\_SAO2010.txt](#)

The copyright of individual parts of the supplement might differ from the CC-BY 3.0 licence.
